# Supplementary material for: Ionic liquid-based aqueous biphasic system for lipase extraction
Source: Royal Society of Chemistry journal article supplement (doi:10.1039/c0gc00075b), 2010-12-16
Supplement: c0gc00075b.pdf [file c0gc00075b.pdf]

## **Ionic Liquid-Based Aqueous Biphasic System for Lipase Extraction**

**F.J. Deive<sup>1,2</sup>, A. Rodríguez<sup>2</sup>, A.B. Pereiro<sup>1,2</sup>, J.M.M. Araújo<sup>1</sup>, M.A. Longo<sup>2</sup>, M.A.Z. Coelho<sup>3</sup>, J. N. Canongia Lopes<sup>1</sup>, J.M.S.S. Esperança<sup>1</sup>, L.P.N. Rebelo<sup>1</sup>, I.M. Marrucho<sup>1\*</sup>**

<sup>1</sup>Instituto de Tecnología Química e Biológica, UNL, Av. República, Apartado 127, 2780-901  
Oeiras, Portugal

<sup>2</sup>Departamento de Ingeniería Química, Universidade de Vigo, 36310, Vigo, Spain

<sup>3</sup>Escola de Química, Universidade Federal do Rio de Janeiro, Centro de Tecnologia, B1.E, Lab.  
103, Cidade Universitária, Rio de Janeiro 21949-900, RJ, Brazil

**Electronic Supplementary Information**

**TABLE 1** Schematic structure of ILs used. a) [RMIM] Cl ( $R = C_nH_{2n+2}$ ,  $n$  ranging from 2 to 5); b) [C<sub>2</sub>MIM] [ethylSO<sub>4</sub>]; c) [C<sub>2</sub>MIM] [RSO<sub>3</sub>] ( $R =$  ethyl and butyl); d) [C<sub>2</sub>MIM] [CH<sub>3</sub>COO].

|                                                                                             |                                                                                              |
|---------------------------------------------------------------------------------------------|----------------------------------------------------------------------------------------------|
| <p>a) 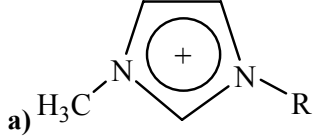</p> | <p>b) </p> |
| <p>c) </p> | <p>d) </p> |

**Fig. 1** Comparison of the ATR-FTIR spectra of (blue) commercial *T. lanuginosus* lipase, (red) pure IL, (pink) lipase + IL after 15 min of incubation, (green) lipase + IL after 3 h of incubation. a) assays with [C<sub>2</sub>MIM] [CH<sub>3</sub>COO] and b) assays with [C<sub>2</sub>MIM] [C<sub>2</sub>SO<sub>4</sub>].

a)

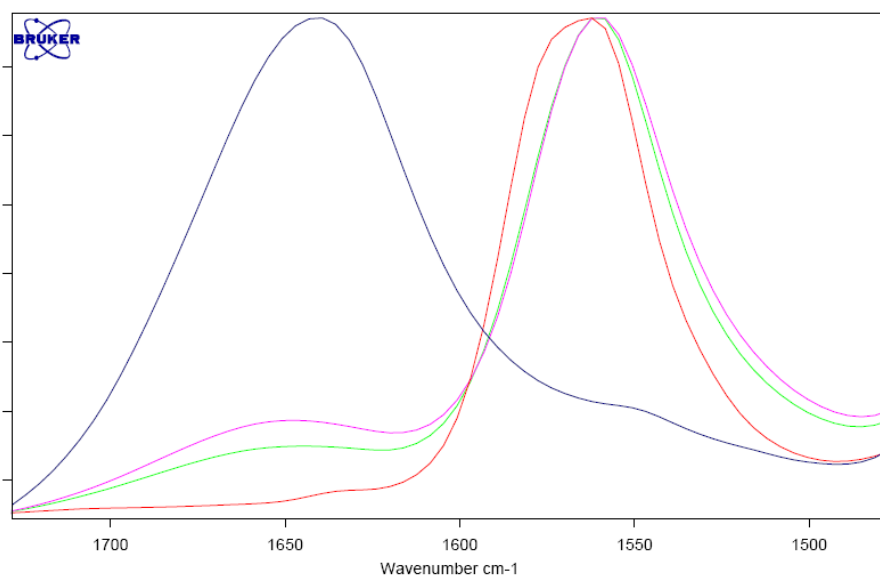

b)

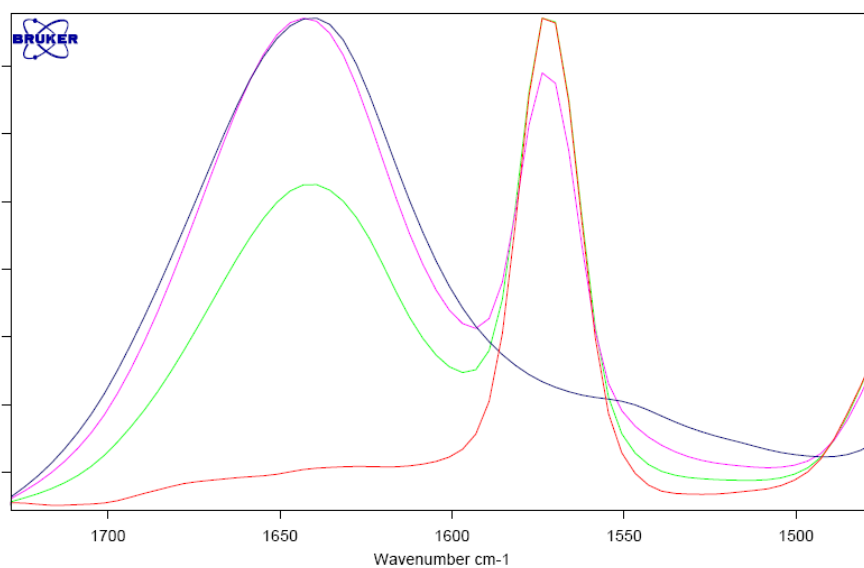

**Fig. 2** Thermal deactivation profiles of *T. lanuginosus* lipase in the presence of ( $\Delta$ ) Water, ( $\square$ ) [C<sub>2</sub>MIM] Cl and ( $\circ$ ) [C<sub>2</sub>MIM] [ethylSO<sub>4</sub>].

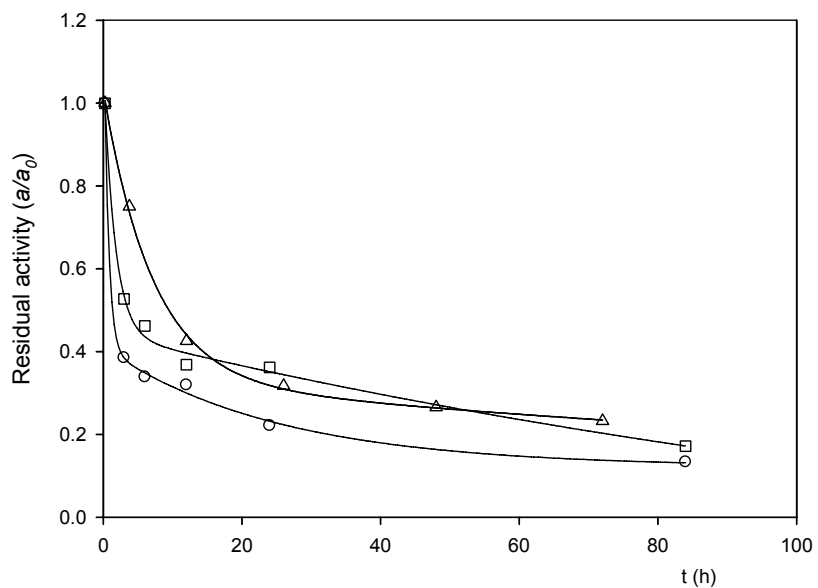

**Mathematical fittings**

An empirical mathematical model developed by Merchuk *et al.*<sup>37</sup> was used to fit the binodal using the following equation:

$$Y = M_1 \exp[(M_2^{0.5} + (M_3 X^3))] \quad (1)$$

where Y and X, are respectively, the IL and salt weight percentages, and  $M_1$ ,  $M_2$ , and  $M_3$  are constants obtained by regression.
